# Supplementary material for: Metal-ion-mediated synergistic coordination: construction of AIE-metallogel sensor arrays for anions and amino acids
Source: Royal Society of Chemistry journal article supplement (doi:10.1039/d2nj02992h), 2022-01-01
Supplement: d2nj02992h1.pdf [file d2nj02992h1.pdf]

*Supplemental Information*

**Metal-ion-mediated synergistic coordination: Construction  
of AIE metallogel sensor array for anions and amino acids**

Hong Yao\*<sup>a</sup>, Yan-Bing Niu<sup>a</sup>, Yin-Ping Hu<sup>a</sup>, Xiao-Wen Sun<sup>a</sup>, Qin-Peng Zhang<sup>a</sup>,  
You-Ming Zhang<sup>a,b</sup>, Tai-Bao Wei<sup>a</sup> and Qi Lin\*<sup>a</sup>

<sup>[a]</sup> *Key Laboratory of Eco-Functional Polymer Materials of the Ministry of Education, Key  
Laboratory of Polymer Materials of Gansu Province, College of Chemistry and Chemical  
Engineering, Northwest Normal University, Lanzhou, Gansu, 730070. P. R. China*

<sup>[b]</sup> *Gansu Natural Energy Research Institute, Lanzhou, Gansu 730046, China*

---

\* Corresponding author

\* E-mail: yhxbz@126.com, linqi2004@126.com.

---

## Table of Contents

- Fig. S1** The  $^1\text{H}$  NMR spectra of gelator **G** in  $\text{CDCl}_3$  (400 MHz, 298K).
- Fig. S2** The  $^{13}\text{C}$  NMR spectra of gelator **G** in  $\text{CDCl}_3$  (600 MHz, 298K).
- Fig. S3** ESI-MS spectra of gelator **G**.
- Fig. S4** FT-IR spectra of (a) Powder **G** and xerogel **OG**, (b) Metallogel **OGCa** and **OGCa-I<sup>-</sup>**, (c) Metallogel **OGFe** and **OGFe-Trp**.
- Fig. S5** XRD patterns of (a) Powder **G** and xerogel **OG**, (b) Metallogel **OGCa** and **OGCa-I<sup>-</sup>**, (c) Metallogel **OGFe** and **OGFe-Trp**.
- Fig. S6** (a) Images of **OG** and **OG** in the presence of 1.0 equiv. various metal ions (using their perchlorate salts as the sources) under ultraviolet light (UV) in cyclohexanol solution (5%, w/v); (b) Fluorescent spectra of **OG** and **OGMs** ( $\lambda_{\text{ex}} = 365 \text{ nm}$ ).
- Fig. S7**  $^1\text{H}$  NMR titration spectra (400 MHz, 298 K) of **OG** (5.0 mg)  $\text{CDCl}_3$  (0.5ml) and  $\text{DMSO-}d_6$  (0.1ml) solution with increasing amounts of  $\text{Ca}^{2+}$ ( $\text{DMSO-}d_6$ , 0.1M).
- Fig. S8** SEM images of (a) Xerogel **OG**, (b) Metallogel **OGCa**, (c) Metallogel complex **OGCa-I<sup>-</sup>**, (d) Metallogel **OGFe**, (e) Metallogel complex **OGFe-Trp**.
- Fig. S9** The photograph of the linear range: (a) Metallogel **OGFe** with  $\text{CN}^-$ , (b) **OGCa** with  $\Gamma^-$ , (c) **OGCu** with  $\Gamma^-$ , (d) **OGCu** with  $\text{N}_3^-$ .
- Fig. S10** The photograph of the linear range: (a) Metallogel **OGFe** with L-Trp, (b) **OGCo** with L-His, (c) **OGNi** with L-Trp.
- Fig. S11**  $^1\text{H}$  NMR titration spectra (400 MHz, 298 K) of **OGCa** (5.0 mg) in  $\text{CDCl}_3$  (0.5mL) and  $\text{DMSO-}d_6$  (0.1ml) solution with increasing amounts of  $\Gamma^-$ .
- Fig. S12** Fluorescence quantum yield according to the corresponding formula (using quinoline sulfate as standard).
- Fig. S13** The fluorescence spectra of (a) **OGFe** which in cyclohexanol solution (5%, w/v) before and after adding with 1.0 equiv. L-Trp and D-Trp; the fluorescence spectra of (b) **OGNi** which in cyclohexanol solution (5%, w/v)

before and after adding with after adding with 1.0 equiv. L-Trp and D-Trp respectively ( $\lambda_{\text{ex}} = 365 \text{ nm}$ ).

**Fig. S14** Photographs of the fluorescence response of **OG** and **OG** in the presence of 1.0 equiv. anions and amino acids respectively at room temperature under 365 nm UV light in cyclohexanol solution (5%, w/v)

**Fig. S15** The Stern-Volmer plot of (a) Metallogel **OGFe** with  $\Gamma^-$ , (b) **OGCa** with  $\Gamma^-$ , (c) **OGCu** with  $\Gamma^-$ , (d) **OGCu** with  $\text{N}_3^-$  (All the metallogels are in cyclohexanol solution (5%, w/v) and adding with 1.0 equiv.  $\Gamma^-$  and  $\text{N}_3^-$ )

**Fig. S16** The Stern-Volmer plot of (a) Metallogel **OGFe** with L-Trp, (b) **OGCo** with L-His, (c) **OGNi** with L-Trp. (All the metallogels are in cyclohexanol solution (5%, w/v) and adding with 1.0 equiv.  $\Gamma^-$  and  $\text{N}_3^-$ )

**Fig. S17** Time-dependency cures of **OGCu-I** (cyclohexanol solution (5%, w/v)) with 0.076 equiv.  $\Gamma^-$

**Table S1** Gelation behavior of gelator **G** in different solvents.

**Table S2** Detection limits of the metallogel **OGMs** for target ions or amino acids.

**Table S3** The fluorescence quantum yield of compound **OG** in cyclohexanol solution (5%, w/v) in different states

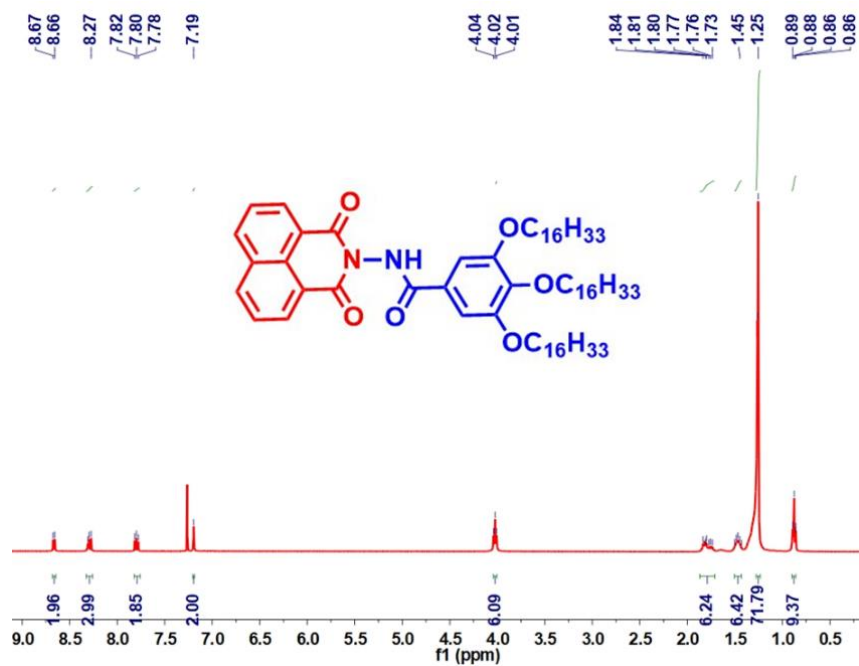

**Fig. S1** The <sup>1</sup>H NMR spectra of gelator **G** in CDCl<sub>3</sub> (400 MHz, 298K).

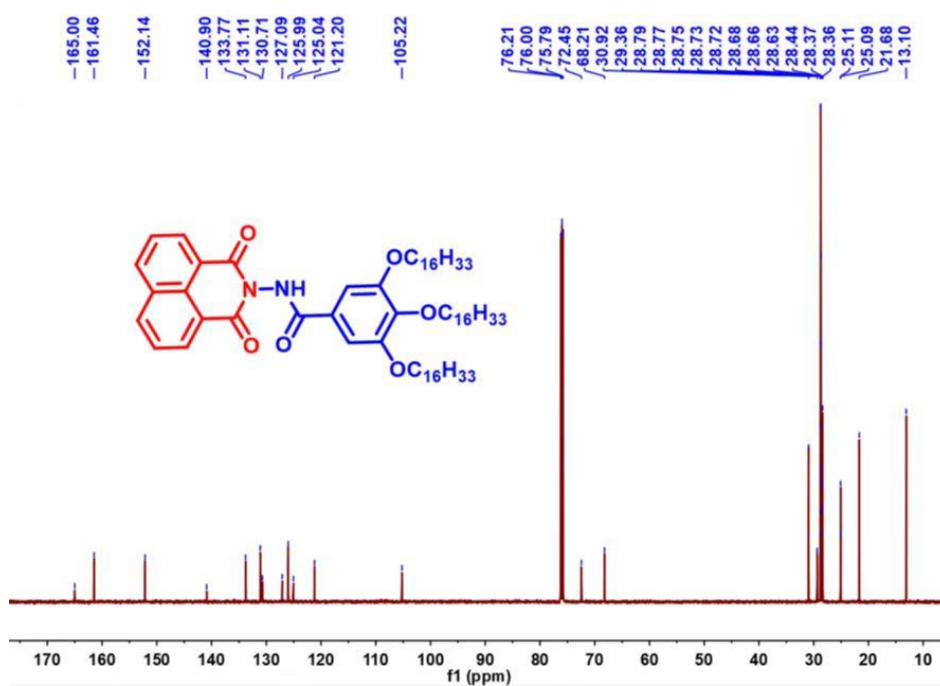

**Fig. S2** The <sup>13</sup>C NMR spectra of gelator **G** in CDCl<sub>3</sub> (600 MHz, 298K).

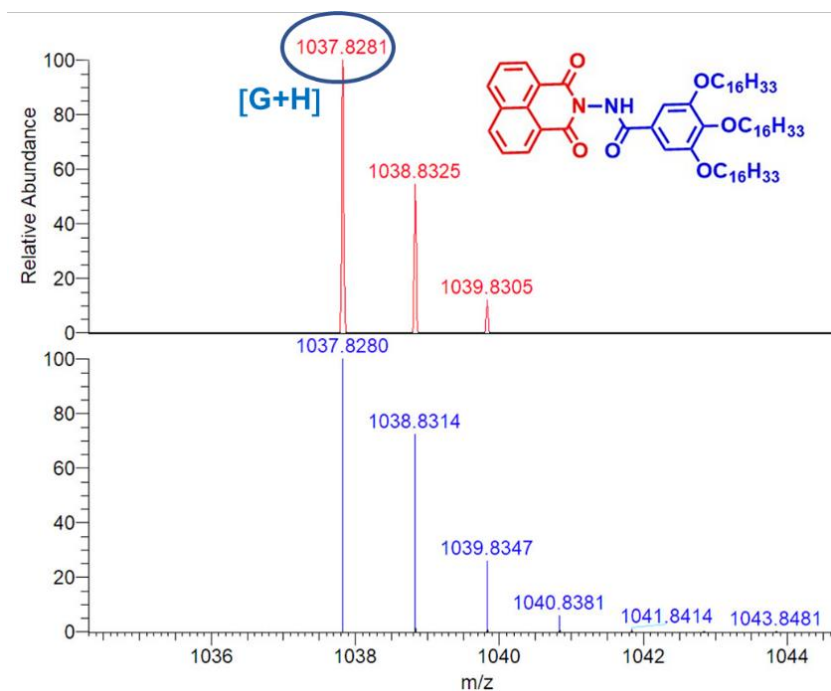

**Fig. S3** ESI-MS spectra of gelator **G**.

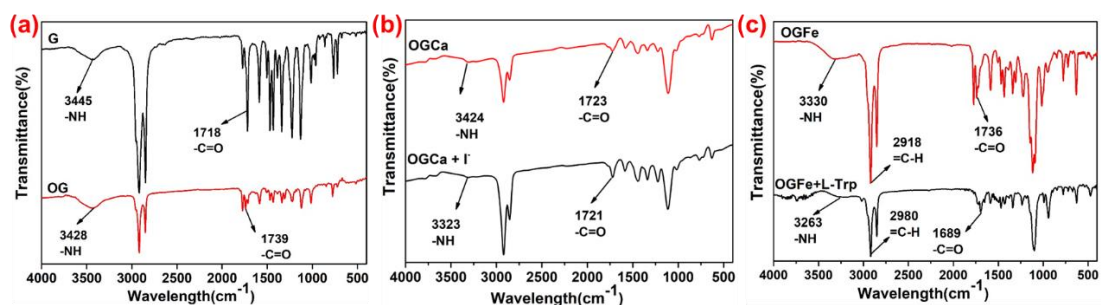

**Fig. S4** FT-IR spectra of (a) Powder **G** and xerogel **OG**, (b) Metallogel **OGCa** and **OGCa-I**, (c) Metallogel **OGFe** and **OGFe-Trp**.

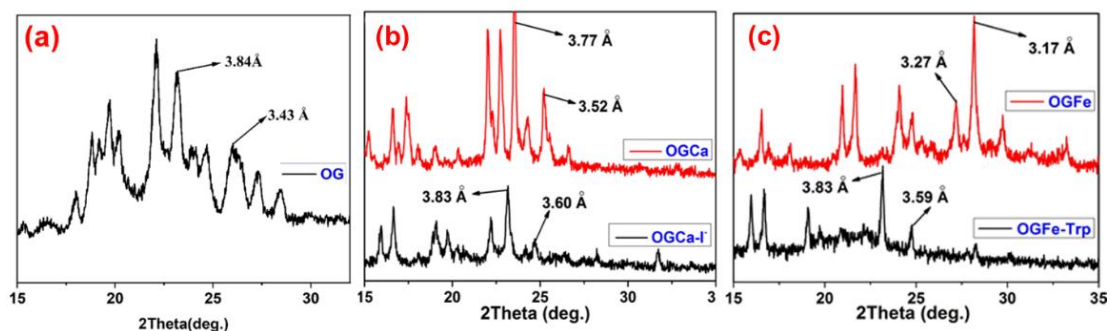

**Fig. S5** XRD patterns of (a) Powder **G** and xerogel **OG**, (b) Metallogel **OGCa** and **OGCa-I**, (c) Metallogel **OGFe** and **OGFe-Trp**.

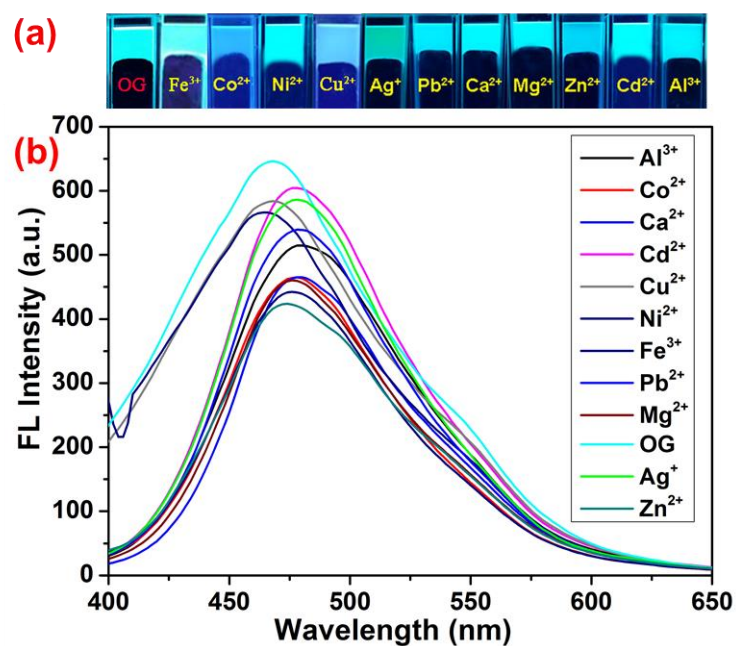

**Fig. S6** (a) Images of **OG** and **OGM**s in the presence of 1.0 equiv. various metal ions (using their perchlorate salts as the sources) under ultraviolet light (UV) in cyclohexanol solution (5%, w/v); (b) Fluorescent spectra of **OG** and **OGM**s ( $\lambda_{\text{exc}} = 365 \text{ nm}$ ).

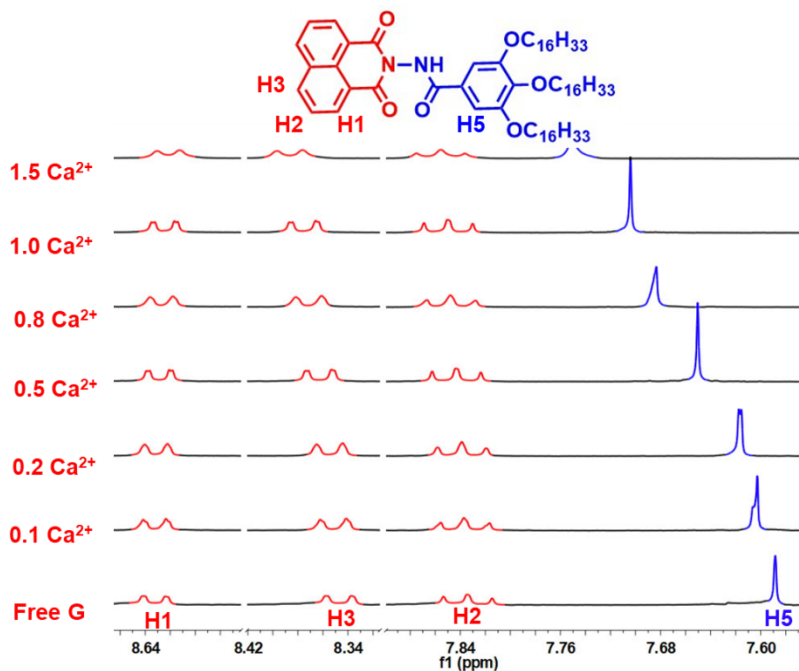

**Fig. S7** <sup>1</sup>H NMR titration spectra (400 MHz, 298 K) of **OG** (5.0 mg) CDCl<sub>3</sub> (0.5 ml) and DMSO-*d*<sub>6</sub> (0.1 ml) solution with increasing amounts of Ca<sup>2+</sup> (DMSO-*d*<sub>6</sub>, 0.1 M).

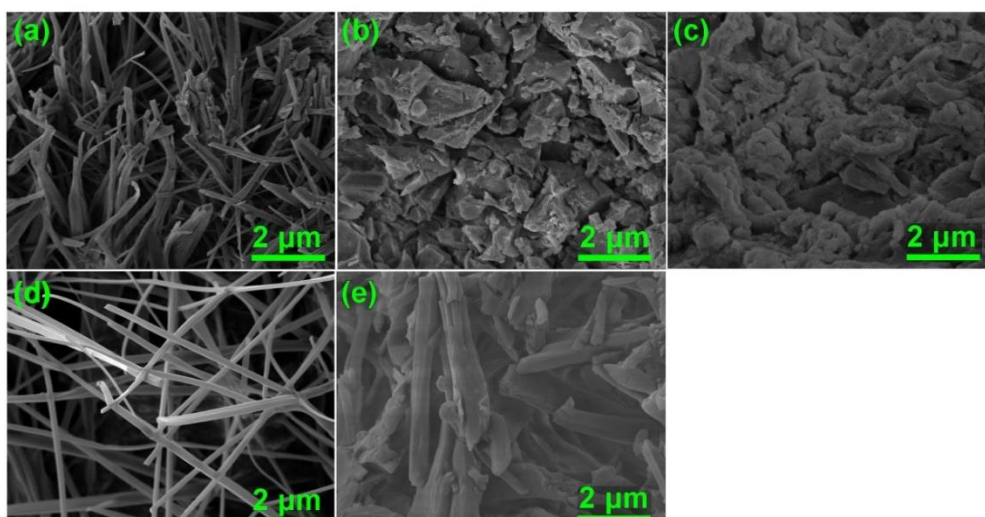

**Fig. S8** SEM images of (a) Xerogel **OG**, (b) Metallogel **OGCa**, (c) Metallogel complex **OGCa-I**, (d) Metallogel **OGFe**, (e) Metallogel complex **OGFe-Trp**.

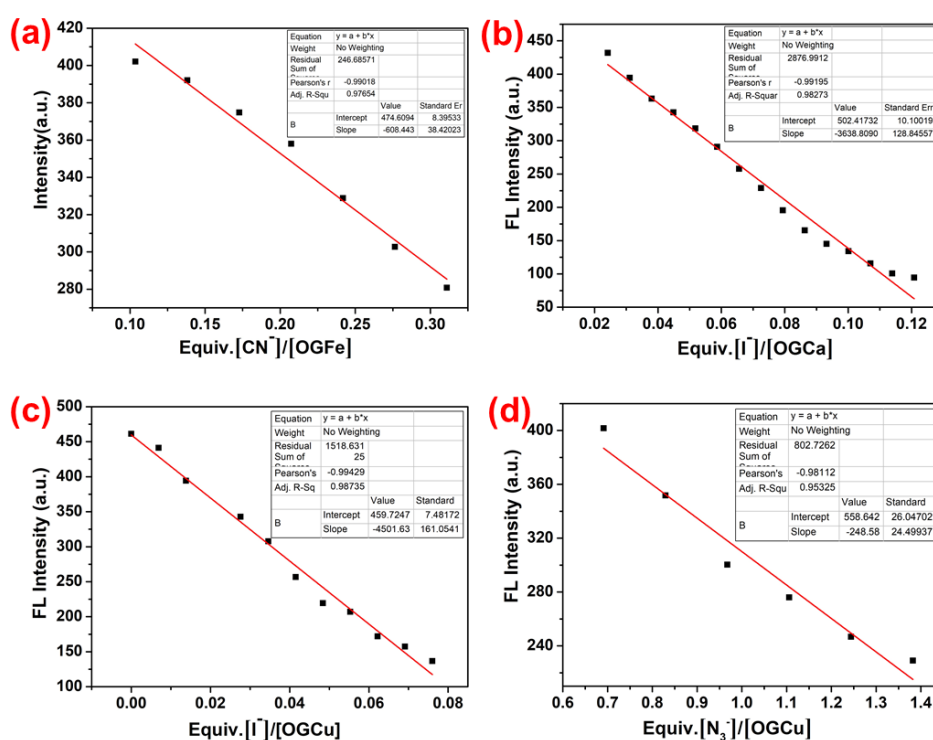

**Fig. S9** The photograph of the linear range: (a) Metallogel **OGFe** with  $CN^-$ , (b) **OGCa** with  $I^-$ , (c) **OGCu** with  $I^-$ , (d) **OGCu** with  $N_3^-$ .

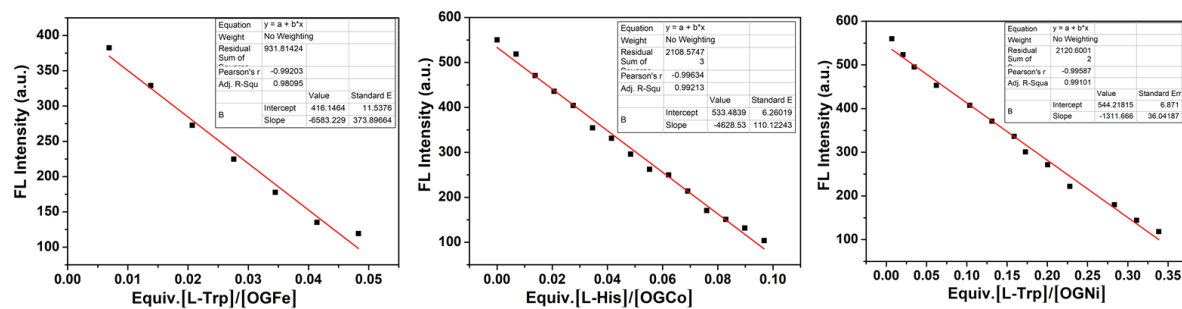

**Fig. S10** The photograph of the linear range: (a) Metallogel **OGFc** with L-Trp, (b) **OGCo** with L-His, (c) **OGNi** with L-Trp.

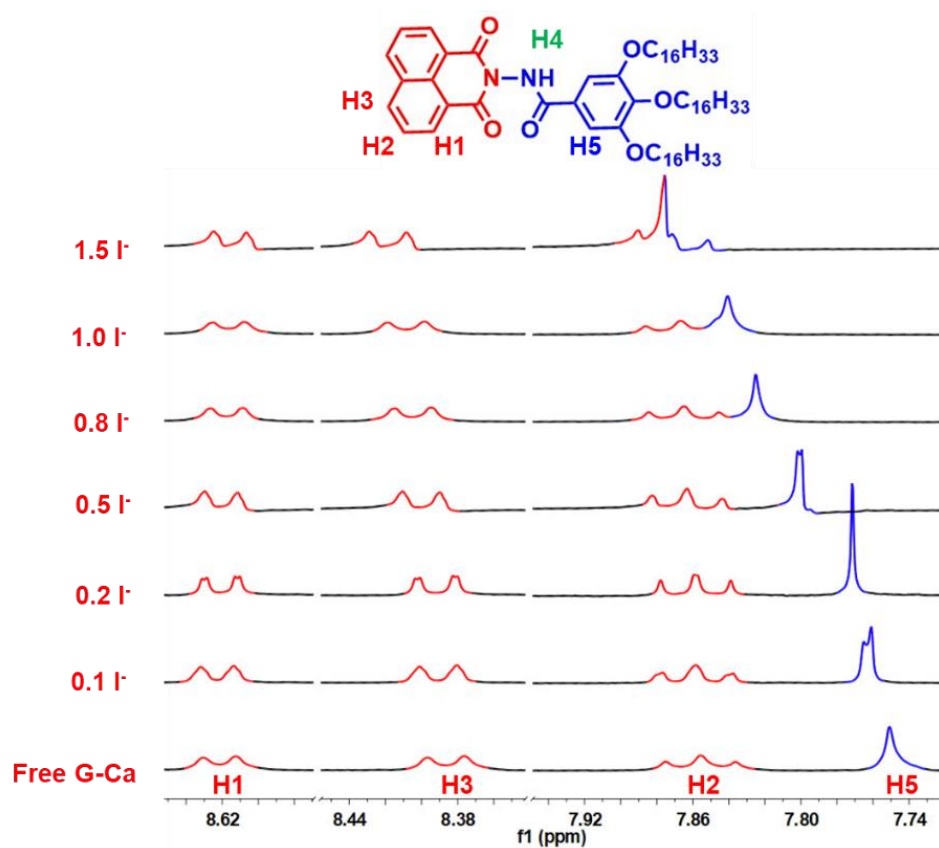

**Fig. S11**  $^1\text{H}$  NMR titration spectra (400 MHz, 298 K) of **OGCa** (5.0 mg) in  $\text{CDCl}_3$  (0.5 mL) and  $\text{DMSO-}d_6$  (0.1 mL) solution with increasing amounts of  $\Gamma$ .



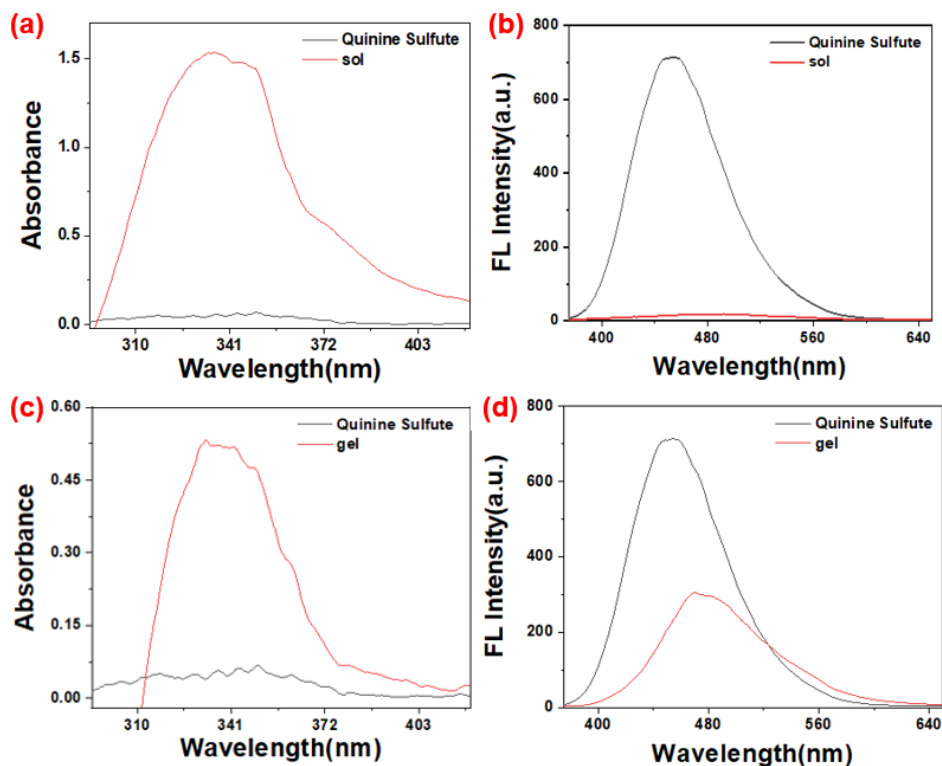

**Fig. S12** Fluorescence quantum yield according to the corresponding formula (using quinoline sulfate as standard).

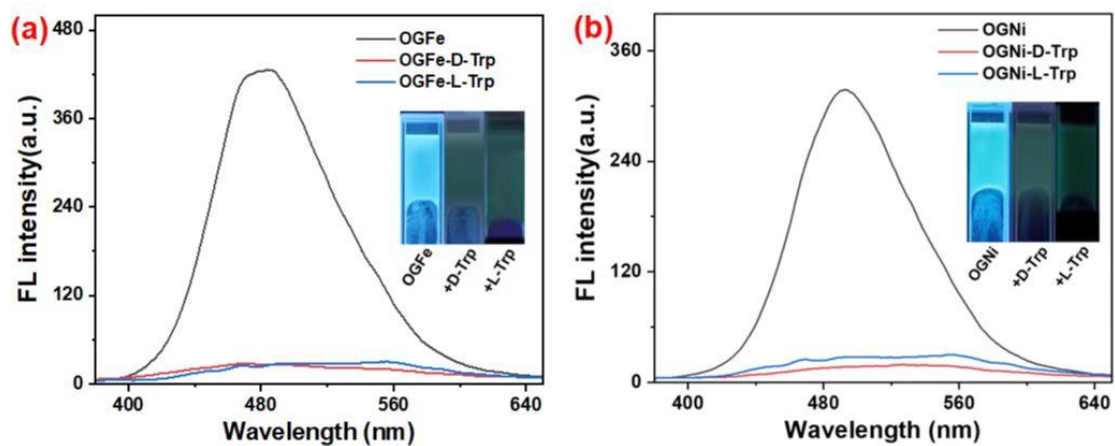

**Fig. S13** The fluorescence spectra and photographs of (a) **OGFe** before and after addition of 1.0 equiv. L-Trp and D-Trp; (b) **OGNi** before and after adding of 1.0 equiv. L-Trp and D-Trp (cyclohexanol solution, 5%, w/v,  $\lambda_{ex} = 365$  nm).

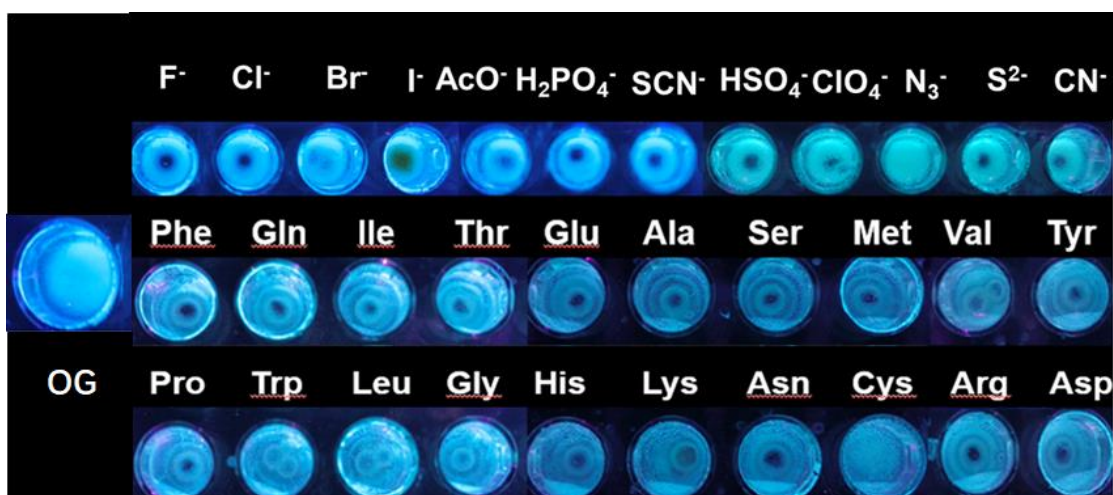

**Fig. S14** Photographs of the fluorescence response of **OG** and **OG** in the presence of 1.0 equiv. different anions and amino acids respectively at room temperature under 365 nm UV light in cyclohexanol solution (5%, w/v).

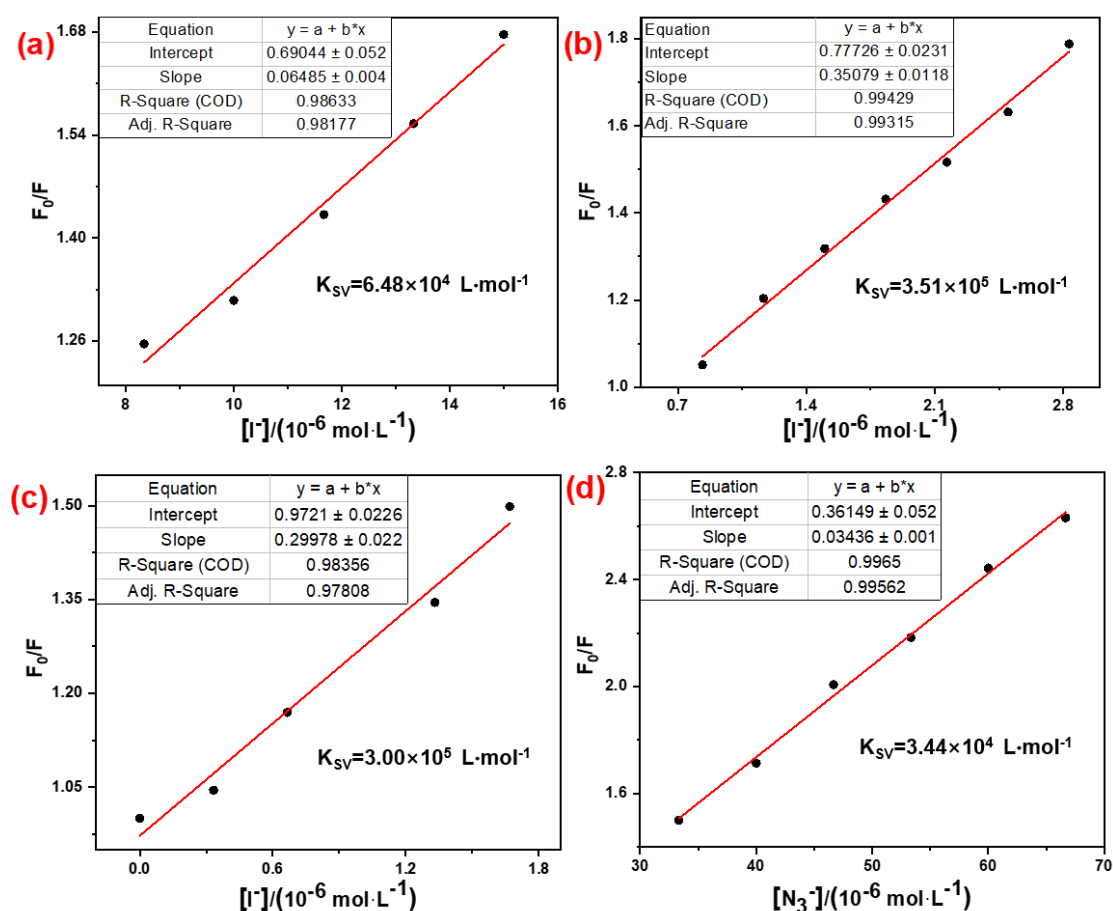

**Fig. S15** Stern-Volmer plot of different metallogel with different anions. (a) **OGFe** with I<sup>-</sup>, (b) **OGCa** with I<sup>-</sup>, (c) **OGCu** with I<sup>-</sup>, (d) **OGCu** with N<sub>3</sub><sup>-</sup> in cyclohexanol

solution (5%, w/v).

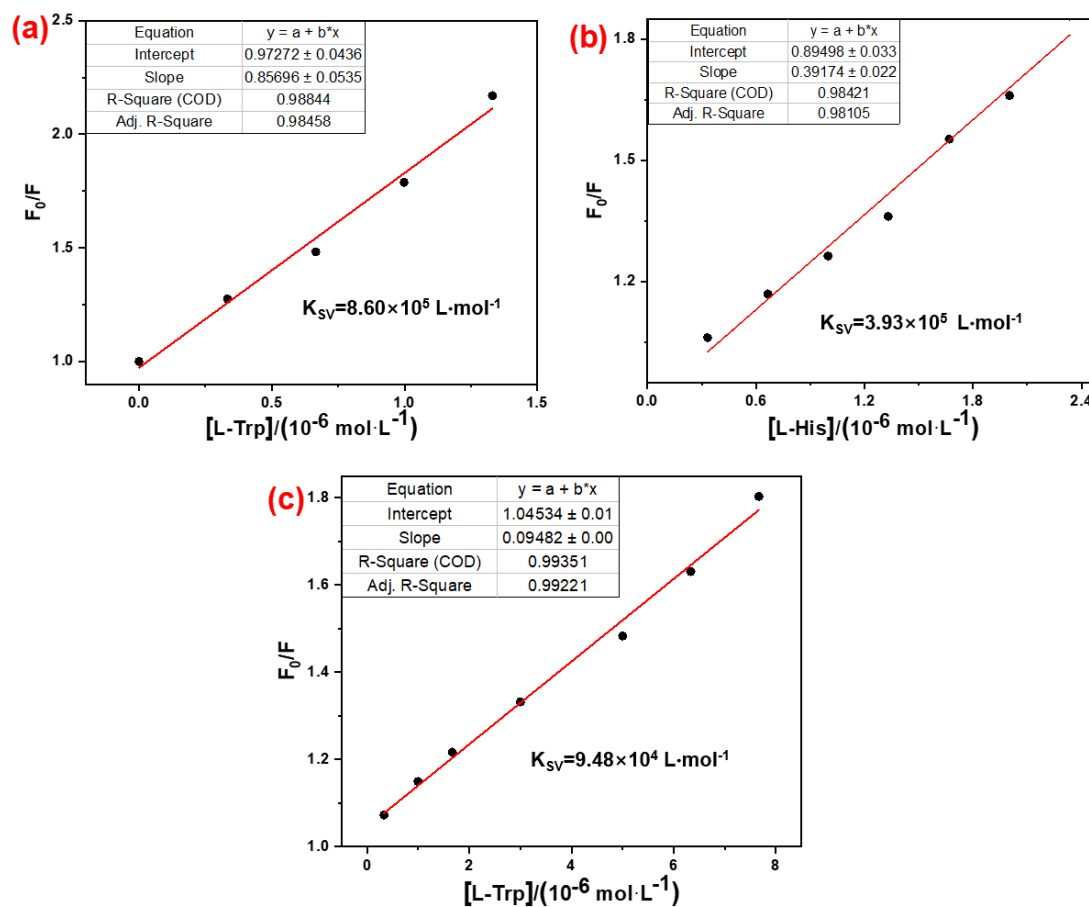

**Fig. S16** Stern-Volmer plot of different metallogel with different amino acids. (a) OGFe with L-Trp, (b) OGCo with L-His, (c) OGNi with L-Trp in cyclohexanol solution (5%, w/v).

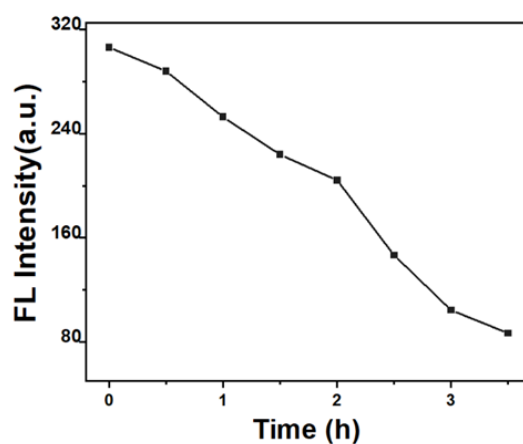

**Fig. S17** Time-dependency cures of OGCu-I (cyclohexanol solution (5%, w/v)) with 0.076 equiv.  $\Gamma$ .

**Table S1** Gelation behavior of gelator **G** in different solvents.

| Entry | Solvent           | State <sup>a</sup> | CGC <sup>b</sup> (%) | T <sub>gel</sub> <sup>c</sup> (°C) |
|-------|-------------------|--------------------|----------------------|------------------------------------|
| 1     | methanol          | P                  | \                    | \                                  |
| 2     | ethanol           | P                  | \                    | \                                  |
| 4     | n-butyl alcohol   | G                  | 6                    | 47                                 |
| 5     | n-propanol        | S                  | \                    | \                                  |
| 6     | n-hexanol         | S                  | \                    | \                                  |
| 7     | Formic acid       | G                  | 7                    | 45                                 |
| 8     | Acetic acid       | S                  | \                    | \                                  |
| 9     | Propanoic acid    | S                  | \                    | \                                  |
| 10    | Hexylic acid      | P                  | \                    | \                                  |
| 11    | Butyric acid      | S                  | \                    | \                                  |
| 12    | CHCl <sub>3</sub> | s                  | \                    | \                                  |
| 13    | DMF               | S                  | \                    | \                                  |
| 14    | Acetonitrile      | P                  | \                    | \                                  |
| 15    | DMSO              | P                  |                      |                                    |
| 16    | Isopropyl alcohol | S                  | \                    | \                                  |
| 17    | Cyclohexanol      | G                  | <b>5</b>             | <b>48-50</b>                       |
| 18    | Cyclohexane       | P                  | \                    | \                                  |
| 19    | n-hexane          | P                  | \                    | \                                  |

a: G, P and S denote gelation, precipitation and solution, respectively.

b: the critical gelation concentration (5%, wt%, 10 mg/mL=1%).

c: the gelation temperature ( °C).

**Table S2** Detection limits of the metallogel **OGMs** for target ions or amino acids.

| Ions/amino acids            | Refs      | Solvent                             | LOD/nM          |
|-----------------------------|-----------|-------------------------------------|-----------------|
| CN <sup>-</sup>             | 43        | DMSO                                | 39.5            |
|                             | 44        | DMSO/H <sub>2</sub> O               | 77.1            |
|                             | 45        | MeOH/H <sub>2</sub> O               | 891.0           |
|                             | 46        | MeOH/H <sub>2</sub> O               | 150.0           |
|                             | This work | Water solution                      | <b>10.6</b>     |
| N <sub>3</sub> <sup>-</sup> | 47        | H <sub>2</sub> O/THF                | 487.0           |
|                             | 48        | DMSO                                | 227.0           |
|                             | 49        | HEPES buffer solution               | 100.0           |
|                             | This work | Water solution                      | <b>46.6</b>     |
| I <sup>-</sup>              | 50        | THF                                 | 7900.0          |
|                             | 51        | Water solution                      | 108.5           |
|                             | 52        | Water solution                      | 300.0           |
|                             | 53        | Water solution                      | 60.0            |
|                             | This work | Water solution                      | <b>3.4/5.2</b>  |
| L-Trp                       | 54        | MeOH/ HEPES buffer solution         | 243.0           |
|                             | 55        | CH <sub>3</sub> CN/H <sub>2</sub> O | 150.0           |
|                             | 56        | DMSO/H <sub>2</sub> O               | 283.0           |
|                             | 57        | Phosphate buffer solution           | 5000.0          |
|                             | This work | Water solution                      | <b>2.4/19.2</b> |
| L-His                       | 58        | HEPES buffer solution               | 100.0           |
|                             | 59        | Acetate buffer solution             | 20.0            |
|                             | 60        | PBS buffer solution                 | 72.2            |
|                             | 61        | Tris-HCL buffer solution            | 36.0            |
|                             | This work | Water solution                      | <b>2.4</b>      |

**Table S3** The fluorescence quantum yield of **OG** in cyclohexanol solution (5%, w/v) in different states

| Compound        | State    | Absorbance | Integral Area | Refractive Index | QY       |
|-----------------|----------|------------|---------------|------------------|----------|
| quinine sulfate | solution | 0.036      | 62346.54      | 1.333            | 0.55     |
| OG              | sol      | 0.673      | 3574.787      | 1.478            | 0.000208 |
|                 | gel      | 0.178      | 30053.29      | 1.478            | 0.065919 |
